# Supplementary material
Source: PubMed Central journal article supplement (PMC3678955)
Supplement: NIHMS444548-supplement-2.pdf [file NIHMS444548-supplement-2.pdf]

| Column # | Probeset ID  | Gene Symbol     | Genbank      | p-value     | Fold-Change |
|----------|--------------|-----------------|--------------|-------------|-------------|
| 16875    | 1448756_at   | S100a9          | NM_009114    | 0.0175381   | 6.06499     |
| 3732     | 1419394_s_at | S100a8          | NM_013650    | 0.0113631   | 5.75675     |
| 20543    | 1452473_at   | Prr15           | NM_030024    | 0.00390855  | 2.79968     |
| 11112    | 1426910_at   | Pawr            | NM_054056    | 0.00220548  | 2.68271     |
| 15041    | 1437279_x_at | Sdc1            | NM_011519    | 0.011654    | 2.33259     |
| 13940    | 1434353_at   | Sfmbt2          | NM_00119880  | 0.0333364   | 1.87674     |
| 2541     | 1418203_at   | Pmaip1          | NM_021451    | 0.00368669  | 1.86296     |
| 6927     | 1422725_at   | Mak             | NM_00114580  | 0.00677425  | 1.80344     |
| 8345     | 1424143_a_at | Cdt1            | NM_026014    | 0.0018441   | 1.78054     |
| 6943     | 1422741_a_at | Bbx             | NM_027444    | 0.029765    | 1.76011     |
| 14974    | 1437103_at   | Igf2bp2         | NM_183029    | 0.00205046  | 1.75581     |
| 3577     | 1419239_at   | Zfp54           | NM_011760    | 0.00637511  | 1.755       |
| 15026    | 1437236_a_at | Zfp110          | NM_022981    | 0.00850678  | 1.73511     |
| 8011     | 1423809_at   | Tcf19           | NM_00116376  | 0.00207471  | 1.72846     |
| 22241    | 1460208_at   | Fbn1            | NM_007993    | 0.0186715   | 1.71937     |
| 1796     | 1417458_s_at | Cks2            | NM_025415    | 0.0043971   | 1.70798     |
| 1821     | 1417483_at   | Nfkbiz          | NM_00115939  | 0.0261122   | 1.66597     |
| 21458    | 1455214_at   | Mitf            | NM_00111319  | 0.00243285  | 1.66366     |
| 4159     | 1419838_s_at | Plk4            | NM_011495    | 0.000325515 | 1.63898     |
| 15668    | 1438841_s_at | Arg2            | NM_009705    | 0.0112002   | 1.6171      |
| 18414    | 1450344_a_at | Ptger3          | NM_011196    | 0.000226708 | 1.60087     |
| 1470     | 1417132_at   | Cdc25a          | NM_007658    | 0.0314915   | 1.59441     |
| 5600     | 1421398_at   | Trim7           | NM_053166    | 0.00321549  | 1.5871      |
| 9955     | 1425753_a_at | Ung             | NM_00104069  | 0.0105152   | 1.5869      |
| 3304     | 1418966_a_at | Dcbld1          | NM_025705    | 0.00621519  | 1.5829      |
| 16167    | 1448026_at   | Chd7            | NM_00108141  | 0.00386103  | 1.58144     |
| 13015    | 1430820_a_at | Bbx             | NM_027444    | 0.0116948   | 1.56247     |
| 21329    | 1454884_at   | Zbtb46          | NM_027656 // | 0.0338197   | 1.535       |
| 18788    | 1450718_at   | Sh2b2           | NM_018825    | 0.0189909   | 1.5338      |
| 8718     | 1424516_at   | B230354K17Rik   | NM_177065    | 0.0290287   | 1.52905     |
| 4720     | 1420518_a_at | Igsf9           | NM_00114580  | 0.0135697   | 1.52149     |
| 7837     | 1423635_at   | Bmp2            | NM_007553    | 0.00882862  | 1.52104     |
| 281      | 1415943_at   | Sdc1            | NM_011519    | 0.0229798   | 1.52029     |
| 8410     | 1424208_at   | Ptger4          | NM_00113607  | 0.0355208   | 1.51975     |
| 14815    | 1436790_a_at | Sox11           | NM_009234    | 0.0157104   | 1.51933     |
| 2408     | 1418070_at   | Cdyl            | NM_00112338  | 0.0460579   | 1.51902     |
| 19068    | 1450998_at   | Zfp110          | NM_022981    | 0.0148789   | 1.51456     |
| 17126    | 1449007_at   | Btg3 /// Gm7334 | NM_009770 // | 0.00790056  | 1.51453     |
| 17273    | 1449154_at   | Col11a1         | NM_007729    | 0.00460304  | 1.51297     |
| 12235    | 1428033_at   | Gm4979          | NM_00114241  | 0.0304301   | 1.50645     |
| 1036     | 1416698_a_at | Cks1b           | NM_016904    | 0.00638692  | 1.50435     |
| 8653     | 1424451_at   | Acaa1b          | NM_146230    | 0.000651684 | 1.50085     |
| 5053     | 1420851_at   | Pard6g          | NM_053117    | 0.0159531   | 1.49433     |
| 11445    | 1427243_at   | Rell1           | NM_145923    | 0.00449609  | 1.49178     |
| 1844     | 1417506_at   | Gmnn            | NM_020567    | 0.0035731   | 1.49159     |
| 17834    | 1449740_s_at | Dsg2            | NM_007883    | 0.0465195   | 1.48852     |

|       |              |               |               |             |         |
|-------|--------------|---------------|---------------|-------------|---------|
| 10098 | 1425896_a_at | Fbn1          | NM_007993     | 0.0251693   | 1.4881  |
| 11478 | 1427276_at   | Smc4          | NM_133786     | 0.0210364   | 1.48204 |
| 21854 | 1456212_x_at | Socs3         | NM_007707     | 0.0398624   | 1.47307 |
| 14246 | 1435057_x_at | Polr1e        | NM_022811     | 0.0142635   | 1.47271 |
| 21750 | 1455990_at   | Kif23         | NM_024245     | 0.0269833   | 1.4715  |
| 6737  | 1422535_at   | Ccne2         | NM_00103713   | 0.0194945   | 1.45967 |
| 5797  | 1421595_at   | Fam184b       | NM_021416     | 0.000543975 | 1.45449 |
| 1469  | 1417131_at   | Cdc25a        | NM_007658     | 0.00917638  | 1.44759 |
| 2909  | 1418571_at   | Tnfrsf12a     | NM_00116174   | 0.0276177   | 1.44189 |
| 21494 | 1455315_at   | Trp53i13      | NM_00102492   | 0.0266587   | 1.4391  |
| 10673 | 1426471_at   | Zfp52         | NM_144515     | 0.0203157   | 1.43882 |
| 21662 | 1455820_x_at | Scarb1        | NM_016741     | 0.00218334  | 1.43827 |
| 4866  | 1420664_s_at | Procr         | NM_011171     | 0.00144333  | 1.43321 |
| 1601  | 1417263_at   | Ptgs2         | NM_011198     | 0.0127247   | 1.42886 |
| 15027 | 1437237_x_at | Zfp110        | NM_022981     | 0.0312267   | 1.42654 |
| 20429 | 1452359_at   | Rell1         | NM_145923     | 0.00437014  | 1.42622 |
| 15928 | 1439476_at   | Dsg2          | NM_007883     | 0.0266685   | 1.42563 |
| 8658  | 1424456_at   | Pvr12         | NM_00115972   | 0.0219322   | 1.4236  |
| 2409  | 1418071_s_at | Cdyl          | NM_00112338   | 0.0133842   | 1.42345 |
| 6068  | 1421866_at   | Nr3c1         | NM_008173     | 0.0153954   | 1.42037 |
| 16156 | 1448012_at   | 3110053B16Rik | XR_105479 /// | 0.00130633  | 1.41929 |
| 10037 | 1425835_a_at | Bbx           | NM_027444     | 0.0107621   | 1.4184  |
| 8054  | 1423852_at   | Shisa2        | NM_145463     | 0.0344767   | 1.41543 |
| 20267 | 1452197_at   | Smc4          | NM_133786     | 0.00657882  | 1.41507 |
| 20728 | 1452658_at   | Krr1          | NM_178610     | 0.00975701  | 1.41434 |
| 17334 | 1449215_at   | Slc22a21      | NM_019723     | 0.0103207   | 1.40766 |
| 14216 | 1434981_at   | E130303B06Rik | NM_198299     | 0.0309352   | 1.40093 |
| 17213 | 1449094_at   | Gjc1          | NM_00115938   | 0.0163363   | 1.3997  |
| 14072 | 1434628_a_at | Rhpn2         | NM_027897     | 0.0301758   | 1.39463 |
| 11503 | 1427301_at   | Cd48          | NM_007649     | 0.0351157   | 1.39408 |
| 19785 | 1451715_at   | Mafb          | NM_010658     | 0.00159018  | 1.39185 |
| 15059 | 1437325_x_at | Aldh18a1      | NM_019698 //  | 0.0237507   | 1.38903 |
| 10638 | 1426436_at   | Tmem159       | NM_145586     | 0.0114172   | 1.38776 |
| 21153 | 1454136_a_at | 4921524J17Rik | NM_025722 //  | 0.000756944 | 1.38417 |
| 559   | 1416221_at   | Fstl1         | NM_008047     | 0.00258505  | 1.38331 |
| 17470 | 1449351_s_at | Pdgfc         | NM_019971     | 0.0107927   | 1.38329 |
| 3098  | 1418760_at   | Rdh11         | NM_021557     | 0.0218223   | 1.3814  |
| 5560  | 1421358_at   | H2-M3         | NM_013819     | 0.000317518 | 1.3794  |
| 2275  | 1417937_at   | Dact1         | NM_00119046   | 0.00463231  | 1.37695 |
| 7126  | 1422924_at   | Tnfsf9        | NM_009404     | 0.0219563   | 1.37553 |
| 7713  | 1423511_at   | Asf1a         | NM_025541     | 0.00516802  | 1.37348 |
| 22142 | 1459882_at   | Asf1a         | NM_025541     | 0.00100893  | 1.37237 |
| 2728  | 1418390_at   | Phf21a        | NM_00110969   | 0.0061484   | 1.37236 |
| 15096 | 1437399_at   | Cldnd1        | NM_171826     | 0.046929    | 1.3704  |
| 15755 | 1439012_a_at | Dck           | NM_007832     | 0.0442201   | 1.36506 |
| 18794 | 1450724_at   | Fam126a       | NM_053090     | 0.0140145   | 1.36367 |
| 17745 | 1449639_at   | ---           | ---           | 0.00651372  | 1.36313 |

|       |              |               |              |             |         |
|-------|--------------|---------------|--------------|-------------|---------|
| 10908 | 1426706_s_at | Xylb          | NM_00103320  | 0.0177216   | 1.36275 |
| 15422 | 1438183_x_at | Sord          | NM_146126    | 0.00387107  | 1.35964 |
| 13970 | 1434425_at   | Tchh          | NM_00116309  | 0.018578    | 1.35588 |
| 15085 | 1437378_x_at | Scarb1        | NM_016741    | 0.000241066 | 1.35526 |
| 1541  | 1417203_at   | Ethe1         | NM_023154    | 0.0463205   | 1.35217 |
| 4415  | 1420160_s_at | Myo1e         | NM_181072    | 0.025592    | 1.35078 |
| 1738  | 1417400_at   | Rai14         | NM_00116640  | 0.0107159   | 1.35013 |
| 11418 | 1427216_at   | lfnz          | NM_197889    | 0.0142543   | 1.34959 |
| 21556 | 1455505_at   | Gatad2a       | NM_00111334  | 0.00285266  | 1.34883 |
| 12906 | 1430195_at   | 2810043O03Rik | ---          | 0.0398542   | 1.345   |
| 20692 | 1452622_a_at | Tradd         | NM_00103316  | 0.00189632  | 1.34454 |
| 18473 | 1450403_at   | Stat2         | NM_019963    | 0.0272125   | 1.34434 |
| 18859 | 1450789_at   | Rhpn1         | NM_00116346  | 0.0229697   | 1.34076 |
| 21973 | 1456515_s_at | Tcfl5         | NM_178254    | 0.03957     | 1.33977 |
| 21761 | 1456005_a_at | Bcl2l11       | NM_009754 // | 0.00130978  | 1.33789 |
| 1795  | 1417457_at   | Cks2          | NM_025415    | 0.0308735   | 1.33745 |
| 12724 | 1429240_at   | Stard4        | NM_133774    | 0.0188854   | 1.33718 |
| 17909 | 1449839_at   | Casp3         | NM_009810    | 0.0252551   | 1.33648 |
| 1068  | 1416730_at   | Rcl1          | NM_021525    | 0.00111654  | 1.33614 |
| 17410 | 1449291_a_at | Dcbl1         | NM_025705    | 0.0106547   | 1.33603 |
| 15674 | 1438847_at   | Mxd3          | NM_016662    | 0.00427788  | 1.33219 |
| 4997  | 1420795_at   | Fgf9          | NM_013518    | 0.00653067  | 1.33211 |
| 1430  | 1417092_at   | Pth1r         | NM_00108393  | 0.0247594   | 1.33077 |
| 18696 | 1450626_at   | Manba         | NM_027288    | 0.00744602  | 1.3264  |
| 3937  | 1419599_s_at | Ms4a6d        | NM_026835    | 0.0205919   | 1.32525 |
| 14382 | 1435449_at   | Bcl2l11       | NM_009754 // | 0.00811908  | 1.32161 |
| 3574  | 1419236_at   | Helb          | NM_080446    | 0.0346267   | 1.3198  |
| 13298 | 1431843_a_at | Nfkbie        | NM_008690    | 0.0127164   | 1.3181  |
| 13282 | 1431805_a_at | Rhpn2         | NM_027897    | 0.0159599   | 1.318   |
| 8697  | 1424495_a_at | Cklf          | NM_00103784  | 0.0299805   | 1.31788 |
| 5107  | 1420905_at   | Il17ra        | NM_008359    | 0.0297942   | 1.31591 |
| 22025 | 1456624_at   | Wipi1         | NM_145940    | 0.0204434   | 1.31584 |
| 10473 | 1426271_at   | Smc5          | NM_153808    | 0.00291526  | 1.31333 |
| 8801  | 1424599_at   | Fgl1          | NM_145594    | 0.049441    | 1.31333 |
| 15773 | 1439060_s_at | Wipi1         | NM_145940    | 0.00622731  | 1.31307 |
| 10957 | 1426755_at   | Ckap4         | NM_175451    | 0.00758386  | 1.31287 |
| 2729  | 1418391_at   | Phf21a        | NM_00110969  | 0.00494824  | 1.31248 |
| 8505  | 1424303_at   | Depdc7        | NM_144804    | 0.0484564   | 1.3117  |
| 20777 | 1452731_x_at | ENSMUSG000000 | NM_00102471  | 0.00707311  | 1.30855 |
| 10786 | 1426584_a_at | Sord          | NM_146126    | 0.0143729   | 1.30797 |
| 12415 | 1428301_at   | ENSMUSG000000 | NM_00102471  | 0.0085275   | 1.30757 |
| 12033 | 1427831_s_at | Zfp260        | NM_011981    | 0.0388342   | 1.30655 |
| 22193 | 1460017_at   | Gm5595        | NM_00100842  | 0.0413093   | 1.30575 |
| 368   | 1416030_a_at | Mcm7          | NM_008568    | 0.00505382  | 1.30551 |
| 198   | 1415860_at   | Kpna2         | NM_010655    | 0.0108779   | 1.30133 |
| 9225  | 1425023_at   | Usp3          | NM_144937    | 0.0227371   | 1.3005  |
| 21224 | 1454640_at   | Chchd7        | NM_00119032  | 0.00386952  | 1.29998 |

|       |              |               |              |             |         |
|-------|--------------|---------------|--------------|-------------|---------|
| 16124 | 1447958_at   | ---           | ---          | 0.00373292  | 1.29987 |
| 11435 | 1427233_at   | Tshz1         | NM_00108130  | 0.0224462   | 1.29865 |
| 6227  | 1422025_at   | Mitf          | NM_00111319  | 0.020049    | 1.29832 |
| 21661 | 1455819_at   | Rod1          | NM_144904 // | 4.23E-05    | 1.29792 |
| 13393 | 1432188_s_at | Nup43         | NM_145706    | 0.00690339  | 1.29671 |
| 19067 | 1450997_at   | Stk17b        | NM_133810    | 0.0358535   | 1.29638 |
| 11404 | 1427202_at   | 4833442J19Rik | NM_177101    | 0.0418549   | 1.29608 |
| 10791 | 1426589_at   | Gab3          | NM_181584    | 0.0192087   | 1.29606 |
| 7533  | 1423331_a_at | Pvr13         | NM_021495 // | 0.00812441  | 1.29521 |
| 17826 | 1449730_s_at | Fzd3          | NM_021458    | 0.0222185   | 1.29125 |
| 9875  | 1425673_at   | Lpp           | NM_00114595  | 0.0136486   | 1.29055 |
| 18912 | 1450842_a_at | Cenpa         | NM_007681    | 0.0155285   | 1.2884  |
| 12896 | 1430125_s_at | Pqlc1         | NM_00116442  | 0.0303888   | 1.28681 |
| 2156  | 1417818_at   | Wwtr1         | NM_00116828  | 0.00240901  | 1.28665 |
| 7658  | 1423456_at   | Bzw2          | NM_025840    | 0.0339445   | 1.28653 |
| 830   | 1416492_at   | Ccne1         | NM_007633    | 0.00561104  | 1.28517 |
| 16365 | 1448246_at   | Hdac1         | NM_008228    | 0.00950837  | 1.28394 |
| 16139 | 1447983_at   | ---           | ---          | 0.0164554   | 1.2839  |
| 7686  | 1423484_at   | Bicc1         | NM_031397    | 0.0129293   | 1.28351 |
| 8316  | 1424114_s_at | Lamb1         | NM_008482    | 0.0281089   | 1.28342 |
| 16847 | 1448728_a_at | Nfkbiz        | NM_00115939  | 0.0160358   | 1.2828  |
| 9119  | 1424917_a_at | Wipi1         | NM_145940    | 0.00745255  | 1.2822  |
| 6678  | 1422476_at   | Ifi30         | NM_023065    | 0.00658576  | 1.28216 |
| 1534  | 1417196_s_at | Wwc2          | NM_133791    | 0.0417435   | 1.28213 |
| 14381 | 1435448_at   | Bcl2l11       | NM_009754 // | 0.000651195 | 1.28116 |
| 21712 | 1455918_at   | Adrb3         | NM_013462    | 0.0102824   | 1.2803  |
| 17602 | 1449483_at   | Polk          | NM_012048    | 0.0215105   | 1.27867 |
| 11717 | 1427515_at   | Pion          | NM_175437    | 0.0308003   | 1.2771  |
| 8251  | 1424049_at   | Lrrc42        | NM_029985    | 0.00557923  | 1.27701 |
| 20268 | 1452198_at   | Kdm2b         | NM_00100395  | 0.0277068   | 1.2749  |
| 19289 | 1451219_at   | Ormdl1        | NM_145517    | 0.0342383   | 1.27426 |
| 14735 | 1436570_at   | Pag1          | NM_00119503  | 0.0121851   | 1.27406 |
| 6875  | 1422673_at   | Prkd1         | NM_008858    | 0.04688     | 1.2737  |
| 10956 | 1426754_x_at | Ckap4         | NM_175451    | 0.0210633   | 1.27329 |
| 19456 | 1451386_at   | Blvrb         | NM_144923    | 0.0141499   | 1.27295 |
| 3996  | 1419658_at   | C920025E04Rik | XM_992574    | 0.00131846  | 1.27282 |
| 3439  | 1419101_at   | Sin3a         | NM_00111035  | 0.00977259  | 1.27103 |
| 16937 | 1448818_at   | Wnt5a         | NM_009524    | 0.0282373   | 1.27094 |
| 3166  | 1418828_at   | Eri1          | NM_026067    | 0.025956    | 1.2709  |
| 11051 | 1426849_at   | Sec24b        | NM_207209    | 0.0333689   | 1.27044 |
| 2161  | 1417823_at   | Gcat          | NM_00116171  | 0.0102891   | 1.26795 |
| 21558 | 1455517_at   | Rbm4          | NM_009032    | 0.0208536   | 1.2675  |
| 21384 | 1455019_x_at | Ckap4         | NM_175451    | 0.00788268  | 1.26692 |
| 9695  | 1425493_at   | Bmpr1a        | NM_009758    | 0.0287138   | 1.26632 |
| 6755  | 1422553_at   | Pten          | NM_008960    | 0.0231222   | 1.26602 |
| 8717  | 1424515_at   | B230354K17Rik | NM_177065    | 0.0091556   | 1.26525 |
| 2215  | 1417877_at   | Eepd1         | NM_026189    | 0.0143819   | 1.2647  |

|       |              |               |              |             |         |
|-------|--------------|---------------|--------------|-------------|---------|
| 18068 | 1449998_at   | Nkx3-1        | NM_010921    | 0.0258127   | 1.26162 |
| 3973  | 1419635_at   | 4833420G17Rik | NM_00111355  | 0.0315935   | 1.26162 |
| 3226  | 1418888_a_at | Sepx1         | NM_013759    | 0.0483373   | 1.26138 |
| 1100  | 1416762_at   | S100a10       | NM_009112    | 0.0169239   | 1.25962 |
| 14663 | 1436337_at   | 4930420K17Rik | NM_00108102  | 0.0448996   | 1.25928 |
| 5948  | 1421746_a_at | Fbxo17        | NM_015796    | 0.0250799   | 1.25838 |
| 10399 | 1426197_at   | LOC636979     | ---          | 0.0444408   | 1.25727 |
| 21528 | 1455433_at   | 3110048L19Rik | NR_003549    | 0.0422751   | 1.2567  |
| 528   | 1416190_a_at | Sec61a1       | NM_016906    | 0.0230172   | 1.25651 |
| 12554 | 1428657_at   | Rreb1         | NM_00103918  | 0.00470314  | 1.25571 |
| 15471 | 1438320_s_at | Mcm7          | NM_008568    | 0.022071    | 1.25559 |
| 12574 | 1428710_at   | Rit1          | NM_00116331  | 0.000332659 | 1.25521 |
| 1419  | 1417081_a_at | Syngn2        | NM_009304    | 0.00633076  | 1.25491 |
| 3461  | 1419123_a_at | Pdgfc         | NM_019971    | 0.0269392   | 1.25351 |
| 21902 | 1456325_at   | Cep68         | NM_172260    | 0.0101152   | 1.2531  |
| 8545  | 1424343_a_at | Eif1a         | NM_010120    | 0.0119313   | 1.25308 |
| 22604 | 1460716_a_at | Cbfb          | NM_00116145  | 0.00190178  | 1.25291 |
| 827   | 1416489_at   | Pi4k2b        | NM_025951 // | 0.0229833   | 1.25197 |
| 10769 | 1426567_a_at | Pqlc1         | NM_00116442  | 0.034649    | 1.25092 |
| 19050 | 1450980_at   | Gtpbp3        | NM_032544    | 0.000653489 | 1.2509  |
| 14633 | 1436235_x_at | 4732471D19Rik | NM_176987    | 0.00977847  | 1.2499  |
| 2780  | 1418442_at   | Xpo1          | NM_00103522  | 0.0318226   | 1.24959 |
| 11304 | 1427102_at   | Slfn4         | NM_011410    | 0.027751    | 1.24891 |
| 18854 | 1450784_at   | Reck          | NM_016678    | 0.0400461   | 1.24755 |
| 15930 | 1439482_at   | Uhrf1bp1      | NM_00108076  | 0.0118221   | 1.24642 |
| 5060  | 1420858_at   | Pkia          | NM_008862    | 0.0206147   | 1.24536 |
| 9060  | 1424858_at   | L2hgdh        | NM_145443    | 0.026074    | 1.24528 |
| 8611  | 1424409_at   | Cldn23        | NM_027998    | 0.0410145   | 1.24438 |
| 14764 | 1436684_a_at | Riok2         | NM_025934    | 0.0428873   | 1.24355 |
| 15109 | 1437434_a_at | Wls           | NM_026582    | 0.000880913 | 1.24247 |
| 12263 | 1428061_at   | Hat1          | NM_026115    | 0.0258864   | 1.24247 |
| 20077 | 1452007_at   | Vamp7         | NM_011515    | 0.0317914   | 1.24172 |
| 14531 | 1435872_at   | ---           | ---          | 0.0432832   | 1.24119 |
| 3367  | 1419029_at   | Ero1l         | NM_015774    | 0.013513    | 1.23748 |
| 19251 | 1451181_at   | Tmem121       | NM_153776    | 0.0106628   | 1.23616 |
| 20251 | 1452181_at   | Ckap4         | NM_175451    | 0.0200953   | 1.23542 |
| 4266  | 1419972_at   | Slc35a5       | NM_028756    | 0.0123277   | 1.23511 |
| 11060 | 1426858_at   | Inhbb         | NM_008381    | 0.0481225   | 1.23456 |
| 7273  | 1423071_x_at | LOC100505088  | XR_107730    | 0.015489    | 1.23454 |
| 19556 | 1451486_at   | Slc46a3       | NM_027872    | 0.00843999  | 1.23393 |
| 3936  | 1419598_at   | Ms4a6d        | NM_026835    | 0.00471068  | 1.23376 |
| 20619 | 1452549_at   | Gm1549        | ---          | 0.0359968   | 1.23369 |
| 12661 | 1428997_at   | Phf23         | NM_030064    | 0.0215735   | 1.23361 |
| 2033  | 1417695_a_at | Soat1         | NM_009230    | 0.0412052   | 1.23309 |
| 19037 | 1450967_at   | Ptplad2       | NM_025760    | 0.0311597   | 1.23303 |
| 19865 | 1451795_at   | Tom1l2        | NM_00103909  | 0.0458524   | 1.23281 |
| 14054 | 1434605_at   | Eif5b         | NM_198303    | 0.0367772   | 1.23219 |

|       |              |                 |              |             |         |
|-------|--------------|-----------------|--------------|-------------|---------|
| 18892 | 1450822_at   | Lyz1            | NM_013590    | 0.0431564   | 1.23184 |
| 3772  | 1419434_at   | Slc2a10         | NM_130451    | 0.0480542   | 1.23103 |
| 1206  | 1416868_at   | Cdkn2c          | NM_007671    | 0.0447812   | 1.23043 |
| 7237  | 1423035_s_at | Txndc17         | NM_026559    | 0.0124537   | 1.22932 |
| 10789 | 1426587_a_at | Stat3           | NM_011486 // | 0.000464715 | 1.22889 |
| 4374  | 1420096_at   | Zscan21         | NM_00104470  | 0.00997105  | 1.22884 |
| 20106 | 1452036_a_at | Tmpo            | NM_00108012  | 0.0251582   | 1.22872 |
| 7236  | 1423034_at   | Txndc17         | NM_026559    | 0.0213731   | 1.22837 |
| 4842  | 1420640_at   | Jmy             | NM_021310    | 4.12E-05    | 1.22799 |
| 12381 | 1428230_at   | Prkd3           | NM_00117100  | 0.00585687  | 1.22792 |
| 10401 | 1426199_x_at | lghmAC38.205.12 | XM_00308678  | 0.035068    | 1.2275  |
| 19625 | 1451555_at   | Nln             | NM_029447    | 0.0258925   | 1.22722 |
| 2490  | 1418152_at   | Hmgn5           | NM_016710    | 0.0476939   | 1.22652 |
| 16514 | 1448395_at   | Sfrp1           | NM_013834    | 0.0242721   | 1.22518 |
| 15194 | 1437644_at   | B3galt2         | NM_020025    | 0.0296163   | 1.22386 |
| 11189 | 1426987_at   | 5430417L22Rik   | NR_030716    | 0.0024423   | 1.22345 |
| 13942 | 1434357_a_at | Kpnb1           | NM_008379    | 0.00450732  | 1.22332 |
| 20311 | 1452241_at   | Topbp1          | NM_176979    | 0.0141344   | 1.22283 |
| 439   | 1416101_a_at | Hist1h1c        | NM_015786    | 0.020654    | 1.22178 |
| 6726  | 1422524_at   | Abcb6           | NM_023732    | 0.000902558 | 1.22013 |
| 5401  | 1421199_at   | Dlg2            | NM_011807    | 0.0485582   | 1.21897 |
| 16510 | 1448391_at   | Rab9            | NM_019773    | 0.0150608   | 1.21837 |
| 11170 | 1426968_a_at | Rdh10           | NM_133832    | 0.00291826  | 1.21821 |
| 2068  | 1417730_at   | Ext1            | NM_010162    | 0.026422    | 1.2182  |
| 11235 | 1427033_at   | Dnmbp           | NM_028029    | 0.0193816   | 1.21724 |
| 9176  | 1424974_at   | Zfp418          | NM_146179    | 8.22E-05    | 1.21719 |
| 12401 | 1428267_at   | Dhx40           | NM_026191    | 0.0248847   | 1.21683 |
| 2937  | 1418599_at   | Col11a1         | NM_007729    | 0.0183267   | 1.21677 |
| 16406 | 1448287_at   | Polr1d          | NM_009087 // | 0.0143732   | 1.21537 |
| 4163  | 1419843_at   | ---             | ---          | 0.0343654   | 1.21508 |
| 13613 | 1433582_at   | 1190002N15Rik   | NM_00103314  | 0.00272685  | 1.21473 |
| 4029  | 1419691_at   | Camp            | NM_009921    | 0.0288086   | 1.2145  |
| 14102 | 1434705_at   | Ctbp2           | NM_00117074  | 0.0300294   | 1.21355 |
| 18799 | 1450729_at   | Hs2st1          | NM_011828    | 0.00196357  | 1.21343 |
| 3181  | 1418843_at   | Slc30a4         | NM_011774    | 0.00421997  | 1.21258 |
| 16647 | 1448528_at   | Pdcd10          | NM_019745    | 0.0282581   | 1.21228 |
| 8340  | 1424138_at   | Rhbdf1          | NM_010117    | 0.0129426   | 1.21221 |
| 12842 | 1429783_at   | Pdlim5          | NM_00119085  | 0.0250956   | 1.2117  |
| 1965  | 1417627_a_at | Limk1           | NM_010717    | 0.0127343   | 1.21154 |
| 17077 | 1448958_at   | Tor1aip2        | NM_00116018  | 0.0459904   | 1.21075 |
| 9168  | 1424966_at   | Tmem40          | NM_00116825  | 0.00381256  | 1.20998 |
| 1932  | 1417594_at   | Gkap1           | NM_019832    | 0.00132936  | 1.20991 |
| 3573  | 1419235_s_at | Helb            | NM_080446    | 0.0025362   | 1.2091  |
| 1657  | 1417319_at   | Pvr13           | NM_021495 // | 0.0144054   | 1.20835 |
| 8053  | 1423851_a_at | Shisa2          | NM_145463    | 0.0158232   | 1.20769 |
| 20370 | 1452300_at   | Fam82b          | NM_025476    | 0.0286729   | 1.2076  |
| 9224  | 1425022_at   | Usp3            | NM_144937    | 0.0331862   | 1.20643 |

|       |              |                 |               |            |          |
|-------|--------------|-----------------|---------------|------------|----------|
| 11401 | 1427199_at   | Fryl            | NM_028194     | 0.00141316 | 1.206    |
| 16620 | 1448501_at   | Tspan6          | NM_019656     | 0.0139777  | 1.20583  |
| 16862 | 1448743_at   | Ssx2ip          | NM_138744     | 0.0144759  | 1.20557  |
| 21231 | 1454656_at   | Spata13         | NM_00103327   | 0.0353025  | 1.20541  |
| 12369 | 1428209_at   | Bex4            | NM_212457     | 0.0356241  | 1.20468  |
| 4518  | 1420296_at   | Clcn5           | NM_016691     | 0.0302728  | 1.20352  |
| 22255 | 1460222_at   | Sh3bp1          | NM_009164     | 0.0158294  | 1.20322  |
| 13882 | 1434215_at   | B230308N11Rik   | ---           | 0.0481414  | 1.20225  |
| 18457 | 1450387_s_at | Ak4             | NM_00117760   | 0.00805763 | 1.20179  |
| 16245 | 1448126_at   | Fam60a          | NM_019643     | 0.018028   | 1.20166  |
| 8183  | 1423981_x_at | Slc25a29        | NM_181328     | 0.0481191  | 1.20141  |
| 7635  | 1423433_at   | Trove2          | NM_013835     | 0.0344231  | 1.2012   |
| 9052  | 1424850_at   | Map3k1          | NM_011945     | 0.0438911  | 1.20092  |
| 16301 | 1448182_a_at | Cd24a           | NM_009846     | 0.00882083 | 1.20069  |
| 7869  | 1423667_at   | Mat2a           | NM_145569     | 0.00206023 | -1.20037 |
| 10096 | 1425894_at   | Mrgprf          | NM_145379     | 0.00829674 | -1.20039 |
| 12183 | 1427981_a_at | Csad            | NM_144942     | 0.020191   | -1.20204 |
| 14297 | 1435214_at   | Gjc2            | NM_080454 //  | 0.0338602  | -1.20216 |
| 14569 | 1435989_x_at | Krt8            | NM_031170     | 0.045375   | -1.20237 |
| 19795 | 1451725_a_at | Psm4            | NM_008951     | 0.0167845  | -1.20331 |
| 21998 | 1456579_x_at | Telo2           | NM_00116366   | 0.0494458  | -1.20381 |
| 10417 | 1426215_at   | Ddc             | NM_00119044   | 0.00552805 | -1.20383 |
| 4508  | 1420284_at   | Bat4            | NM_00112859   | 0.00959046 | -1.20436 |
| 17140 | 1449021_at   | Rpp21           | NM_026308     | 0.0429404  | -1.20552 |
| 4581  | 1420379_at   | Slco1a1         | NM_013797     | 0.045538   | -1.20555 |
| 1243  | 1416905_at   | Guca2a          | NM_008190     | 0.0178725  | -1.20625 |
| 22512 | 1460596_at   | Agtrap          | NM_009642     | 0.0426575  | -1.20728 |
| 1546  | 1417208_at   | Amacr           | NM_008537     | 0.0387843  | -1.20778 |
| 3853  | 1419515_at   | Fgd2            | NM_00115953   | 0.00203211 | -1.20837 |
| 5839  | 1421637_at   | Slc5a4a         | NM_133184     | 0.0101802  | -1.20891 |
| 11631 | 1427429_at   | Csf2            | NM_009969     | 0.00500949 | -1.20975 |
| 1923  | 1417585_at   | Nup210          | NM_018815     | 0.00803223 | -1.21005 |
| 3188  | 1418850_at   | Epc1            | NM_007935 //  | 0.0436712  | -1.21051 |
| 5456  | 1421254_a_at | Sgcg            | NM_011892     | 0.0441921  | -1.21103 |
| 4553  | 1420351_at   | Tnfrsf4         | NM_011659     | 0.0324892  | -1.21174 |
| 12857 | 1429866_at   | Ahnak           | NM_00103995   | 0.0450116  | -1.21188 |
| 16892 | 1448773_at   | Gm10036 /// Gm: | NM_025919 //  | 0.0053786  | -1.21202 |
| 13590 | 1433543_at   | Anln            | NM_028390     | 0.0204741  | -1.21249 |
| 14565 | 1435979_a_at | Myo15b          | XR_106391 /// | 0.0287649  | -1.21265 |
| 9246  | 1425044_at   | Kcnj6           | NM_00102558   | 0.034065   | -1.21277 |
| 22530 | 1460642_at   | Traf4           | NM_009423     | 0.0232012  | -1.21289 |
| 14932 | 1437012_x_at | Rapgef3         | NM_00117781   | 0.00585079 | -1.21295 |
| 2191  | 1417853_at   | Clca1           | NM_009899     | 0.0314007  | -1.213   |
| 5204  | 1421002_at   | Angptl2         | NM_011923     | 0.0257229  | -1.21381 |
| 2621  | 1418283_at   | Cldn4           | NM_009903     | 0.0150621  | -1.21403 |
| 20384 | 1452314_at   | Kif11           | NM_010615     | 0.0147027  | -1.2148  |
| 8213  | 1424011_at   | Aqp9            | NM_022026     | 0.00658113 | -1.21499 |

|       |              |                  |              |            |          |
|-------|--------------|------------------|--------------|------------|----------|
| 19084 | 1451014_at   | Ror1             | NM_013845    | 0.0316438  | -1.21502 |
| 11765 | 1427563_at   | Dlx6as           | NR_002839    | 0.0277269  | -1.21504 |
| 18377 | 1450307_x_at | H2afy3           | NR_003523    | 0.0124782  | -1.21516 |
| 3208  | 1418870_at   | 4930579J09Rik    | NM_133689    | 0.0445497  | -1.21523 |
| 16565 | 1448446_at   | Deaf1            | NM_016874 // | 0.0249105  | -1.21549 |
| 6478  | 1422276_at   | P2ry4            | NM_020621    | 0.0255239  | -1.21564 |
| 5009  | 1420807_a_at | Dlk2             | NM_207666    | 0.013465   | -1.21621 |
| 17502 | 1449383_at   | Adssl1           | NM_007421    | 0.0399415  | -1.21638 |
| 18055 | 1449985_at   | 1700072E05Rik    | NM_028554    | 0.0219435  | -1.21654 |
| 2651  | 1418313_at   | Zfp276           | NM_020497    | 0.0238577  | -1.21721 |
| 10314 | 1426112_a_at | Cd72             | NM_00111032  | 0.0412899  | -1.21758 |
| 5761  | 1421559_at   | Abo              | NM_030718    | 0.00966968 | -1.21771 |
| 5781  | 1421579_at   | Hoxa9            | NM_010456    | 0.0374151  | -1.21863 |
| 12648 | 1428929_s_at | Slc25a26         | NM_026255    | 0.0054626  | -1.21881 |
| 11100 | 1426898_at   | Tab1             | NM_025609    | 0.041172   | -1.21908 |
| 9411  | 1425209_at   | Zfp84            | NM_023750    | 0.00494352 | -1.21932 |
| 18620 | 1450550_at   | Ii5              | NM_010558    | 0.0230042  | -1.2197  |
| 8463  | 1424261_at   | Zfp672           | NM_178761 // | 0.0447095  | -1.21982 |
| 12657 | 1428982_at   | Atad2b           | NM_00109962  | 0.0151554  | -1.21997 |
| 16310 | 1448191_at   | Plk1             | NM_011121    | 0.0445051  | -1.2207  |
| 7124  | 1422922_at   | Recql4           | NM_058214    | 0.0326176  | -1.22131 |
| 10670 | 1426468_at   | 0610037L13Rik    | NM_028754    | 0.048045   | -1.22248 |
| 20030 | 1451960_a_at | Rev3l            | NM_011264    | 0.00536796 | -1.22314 |
| 10102 | 1425900_at   | Hkdc1            | NM_145419    | 0.0242214  | -1.22346 |
| 15669 | 1438842_at   | Mtch2            | NM_019758    | 0.0481811  | -1.22434 |
| 5870  | 1421668_x_at | Speer3           | NM_027650    | 0.0336609  | -1.22652 |
| 11080 | 1426878_at   | Pbrm1            | NM_00108125  | 0.00923855 | -1.22655 |
| 12510 | 1428531_at   | Ints7            | NM_178632    | 0.0197623  | -1.22663 |
| 12793 | 1429558_a_at | Larp7            | NM_138593    | 0.0138936  | -1.22675 |
| 14447 | 1435655_at   | Rpl12            | NM_009076    | 0.0170858  | -1.22701 |
| 10246 | 1426044_a_at | Prkcq            | NM_008859    | 0.0212588  | -1.22735 |
| 3981  | 1419643_s_at | 2310057J18Rik // | NM_026336    | 0.0391644  | -1.22862 |
| 4909  | 1420707_a_at | Traip            | NM_011634    | 0.0385461  | -1.2296  |
| 13151 | 1431373_at   | Pop5             | NM_026398    | 0.0379177  | -1.22992 |
| 15852 | 1439369_x_at | Slc9a3r2         | NM_023055 // | 0.0170708  | -1.23102 |
| 20405 | 1452335_at   | Mfsd8            | NM_028140    | 0.00522465 | -1.23131 |
| 10205 | 1426003_at   | Ntrk3            | NM_008746 // | 0.0362225  | -1.23139 |
| 5810  | 1421608_at   | Ii20             | NM_021380    | 0.0270457  | -1.23182 |
| 18047 | 1449977_at   | Egr4             | NM_020596    | 0.0448401  | -1.23188 |
| 19100 | 1451030_at   | Akr1c21          | NM_029901    | 0.0162947  | -1.23233 |
| 19207 | 1451137_a_at | Brd8             | NM_030147    | 0.0147159  | -1.2328  |
| 14732 | 1436565_at   | Ceacam10         | NM_007675    | 0.0219548  | -1.233   |
| 2681  | 1418343_at   | Gtf2ird2         | NM_053266    | 0.0117784  | -1.23314 |
| 8431  | 1424229_at   | Dyrk3            | NM_145508    | 0.0477285  | -1.23327 |
| 13981 | 1434445_at   | Arhgap39         | NM_00116828  | 0.0305237  | -1.23331 |
| 21595 | 1455641_at   | 1600014C10Rik    | NM_00108538  | 0.0435173  | -1.23341 |
| 6746  | 1422544_at   | Myo10            | NM_019472    | 0.00563647 | -1.23422 |



|       |              |                  |               |             |          |
|-------|--------------|------------------|---------------|-------------|----------|
| 14068 | 1434623_at   | 2810422J05Rik // | NM_019883 //  | 0.0220499   | -1.23473 |
| 12007 | 1427805_at   | ---              | ---           | 0.0339459   | -1.23475 |
| 9013  | 1424811_at   | Cml5             | NM_023493     | 0.0268968   | -1.23521 |
| 3292  | 1418954_at   | Camkk1           | NM_018883     | 0.00375862  | -1.23532 |
| 20274 | 1452204_at   | Anks1            | NM_181413     | 0.000966419 | -1.23538 |
| 5299  | 1421097_at   | Endog            | NM_007931     | 0.018351    | -1.23552 |
| 2011  | 1417673_at   | Grb14            | NM_016719     | 0.0078833   | -1.23673 |
| 1357  | 1417019_a_at | Cdc6             | NM_00102577   | 0.0218384   | -1.23702 |
| 10280 | 1426078_a_at | Gpr108           | NM_030084     | 0.0162646   | -1.23725 |
| 20552 | 1452482_at   | ErbB3            | NM_010153     | 0.0347268   | -1.23916 |
| 21022 | 1453686_x_at | Nphp1            | NM_016902     | 0.0101372   | -1.23931 |
| 5380  | 1421178_at   | Mgat4c           | NM_00116236   | 0.048418    | -1.2398  |
| 12006 | 1427804_at   | ---              | ---           | 0.00601661  | -1.24013 |
| 10565 | 1426363_x_at | H2afy2           | NM_207000     | 0.0444451   | -1.24052 |
| 8620  | 1424418_at   | Slc25a38         | NM_144793     | 0.00717378  | -1.24053 |
| 8814  | 1424612_at   | Nipal2           | NM_145469     | 0.0114023   | -1.24139 |
| 9630  | 1425428_at   | Hif3a            | NM_00116295   | 0.0159075   | -1.24328 |
| 15173 | 1437592_x_at | Ccdc101          | NM_029339     | 0.00402617  | -1.24346 |
| 2779  | 1418441_at   | Col8a1           | NM_007739     | 0.0358974   | -1.24357 |
| 4135  | 1419808_at   | Cog4             | NM_133973     | 0.00620447  | -1.24402 |
| 18162 | 1450092_at   | Ighmbp2          | NM_009212     | 0.0255852   | -1.24421 |
| 9456  | 1425254_at   | Foxn4            | NM_148935     | 0.0266201   | -1.24468 |
| 19660 | 1451590_at   | Cplx4            | NM_145493     | 0.0341076   | -1.24481 |
| 4910  | 1420708_at   | Traip            | NM_011634     | 0.0260561   | -1.24485 |
| 13763 | 1433924_at   | Peg3             | NM_008817     | 0.0114471   | -1.24552 |
| 18402 | 1450332_s_at | Fmo5             | NM_00116176   | 0.0395196   | -1.24561 |
| 6141  | 1421939_a_at | Stag1            | NM_009282     | 0.00544241  | -1.24567 |
| 3290  | 1418952_at   | Txlnb            | NM_138628     | 0.0113436   | -1.24585 |
| 14640 | 1436255_at   | D830044I16Rik    | XR_105162 /// | 0.040685    | -1.24633 |
| 2288  | 1417950_a_at | Apoa2            | NM_013474     | 0.0360707   | -1.2465  |
| 11364 | 1427162_a_at | Elk4             | NM_007923     | 0.0421279   | -1.24786 |
| 9831  | 1425629_a_at | Nol6             | NM_139236     | 0.0273932   | -1.24818 |
| 19325 | 1451255_at   | Lsr              | NM_00116418   | 0.00540565  | -1.2482  |
| 15421 | 1438182_x_at | Asb6             | NM_133346     | 0.0154735   | -1.24913 |
| 1982  | 1417644_at   | Sspn             | NM_010656     | 0.0133634   | -1.24968 |
| 12421 | 1428310_at   | Larp7            | NM_138593     | 0.00924713  | -1.25018 |
| 12973 | 1430562_at   | Zkscan5          | NM_00116794   | 0.0192454   | -1.25037 |
| 7307  | 1423105_a_at | Yeats4           | NM_026570     | 0.0161161   | -1.25059 |
| 14285 | 1435172_at   | Eomes            | NM_00116478   | 0.0375981   | -1.25081 |
| 15373 | 1438083_at   | Hhip             | NM_020259     | 0.0231015   | -1.25082 |
| 6181  | 1421979_at   | Phex             | NM_011077     | 0.00965501  | -1.25095 |
| 16581 | 1448462_at   | Tdg              | NM_011561 //  | 0.014216    | -1.25127 |
| 4905  | 1420703_at   | Csf2ra           | NM_009970     | 0.0432783   | -1.25253 |
| 6713  | 1422511_a_at | Ogfr             | NM_031373     | 0.0360477   | -1.25316 |
| 5625  | 1421423_at   | Pr17c1           | NM_026206     | 0.0309202   | -1.25364 |
| 1030  | 1416692_at   | Coil             | NM_016706     | 0.0194732   | -1.25453 |
| 9189  | 1424987_at   | 5430435G22Rik    | NM_145509     | 0.00944841  | -1.25492 |

|       |              |                |              |            |          |
|-------|--------------|----------------|--------------|------------|----------|
| 2347  | 1418009_at   | Gcfc1          | NM_026110    | 0.00554335 | -1.25534 |
| 5903  | 1421701_at   | Vmn2r10        | NM_009491    | 2.39E-05   | -1.25599 |
| 18674 | 1450604_at   | Olfr140        | NM_020515    | 0.033456   | -1.25645 |
| 17045 | 1448926_at   | Hoxa5          | NM_010453    | 0.0226456  | -1.25654 |
| 2787  | 1418449_at   | Lad1           | NM_133664    | 0.01946    | -1.2578  |
| 21897 | 1456315_a_at | Ptpla          | NM_00101239  | 0.0318974  | -1.2582  |
| 9890  | 1425688_a_at | Dpys           | NM_00116446  | 0.0115034  | -1.25891 |
| 69    | 1415731_at   | Angel2         | NM_021421    | 0.0302371  | -1.25972 |
| 3966  | 1419628_at   | Vsx2           | NM_007701    | 0.0105103  | -1.25991 |
| 6586  | 1422384_at   | Olfr1509       | NM_020514    | 0.00588773 | -1.26013 |
| 10816 | 1426614_at   | Zmynd8         | NM_027230    | 0.0428151  | -1.26171 |
| 11636 | 1427434_at   | Naip6          | NM_010871    | 0.00372987 | -1.26172 |
| 10752 | 1426550_at   | Sidt1          | NM_00115941  | 0.0141694  | -1.2624  |
| 2144  | 1417806_at   | Popdc2         | NM_00108198  | 0.0420987  | -1.26351 |
| 11825 | 1427623_at   | Herc2          | NM_010418    | 0.00214581 | -1.26372 |
| 12813 | 1429632_at   | Trappc4        | NM_021789    | 0.0327753  | -1.26378 |
| 17242 | 1449123_at   | Itih3          | NM_008407    | 0.0294782  | -1.26523 |
| 1839  | 1417501_at   | Fbxo6          | NM_00116370  | 0.0138812  | -1.26539 |
| 9963  | 1425761_a_at | Nfatc1         | NM_00116410  | 0.00462329 | -1.26545 |
| 1128  | 1416790_a_at | Gm5806 /// Tdg | NM_011561 // | 0.00685543 | -1.26561 |
| 1570  | 1417232_at   | Cldn2          | NM_016675    | 0.0205676  | -1.26575 |
| 11619 | 1427417_at   | Scml4          | NM_172938    | 0.00144449 | -1.26625 |
| 16694 | 1448575_at   | Il7r           | NM_008372    | 0.0271021  | -1.26686 |
| 10324 | 1426122_a_at | Coro6          | NM_139128 // | 0.00211174 | -1.26742 |
| 7626  | 1423424_at   | Zic3           | NM_009575    | 0.0338445  | -1.26766 |
| 12216 | 1428014_at   | Hist1h4h       | NM_153173    | 0.0369201  | -1.26773 |
| 9243  | 1425041_at   | Lhx3           | NM_00103965  | 0.047544   | -1.26881 |
| 4210  | 1419909_at   | Mphosph9       | NM_00108132  | 0.00132728 | -1.26928 |
| 14887 | 1436930_x_at | Gm6453 /// Hmb | NM_00111025  | 0.00016326 | -1.26955 |
| 14464 | 1435715_x_at | Tdg            | NM_011561 // | 0.0125817  | -1.26963 |
| 8282  | 1424080_at   | Dcps           | NM_027030    | 0.0199077  | -1.26997 |
| 7587  | 1423385_at   | Actr8          | NM_027493    | 0.0117137  | -1.27116 |
| 19933 | 1451863_at   | Uts2r          | NM_145440    | 0.0310336  | -1.27123 |
| 3189  | 1418851_at   | Trim39         | NM_024468 // | 0.0355274  | -1.27281 |
| 18740 | 1450670_at   | Dbh            | NM_138942    | 0.00893616 | -1.27416 |
| 18180 | 1450110_at   | Adh7           | NM_009626    | 0.036036   | -1.2746  |
| 9051  | 1424849_at   | Wdr62          | NM_146186    | 0.022637   | -1.27575 |
| 8709  | 1424507_at   | Rin1           | NM_145495    | 0.0403545  | -1.27777 |
| 3695  | 1419357_at   | Isy1           | NM_133934    | 0.0118523  | -1.27848 |
| 19496 | 1451426_at   | Dhx58          | NM_030150    | 0.0309227  | -1.27895 |
| 15583 | 1438630_x_at | Mat2a          | NM_145569    | 0.0159845  | -1.2802  |
| 21946 | 1456447_at   | Rpl18          | NM_009077    | 0.0237746  | -1.28132 |
| 2448  | 1418110_a_at | Inpp5d         | NM_00111019  | 0.0181478  | -1.28136 |
| 15010 | 1437198_at   | Lig3           | NM_010716    | 0.0358474  | -1.28168 |
| 11811 | 1427609_at   | Sox14          | NM_011440    | 0.0268062  | -1.28234 |
| 2136  | 1417798_at   | 1810019J16Rik  | NM_00108391  | 0.0066136  | -1.28567 |
| 3217  | 1418879_at   | Fam110c        | NM_027828    | 0.0272853  | -1.28693 |

|       |              |               |              |             |          |
|-------|--------------|---------------|--------------|-------------|----------|
| 9574  | 1425372_at   | Dnajc19       | NM_00102621  | 0.00533708  | -1.28877 |
| 20180 | 1452110_at   | Mtrr          | NM_172480    | 0.014339    | -1.28987 |
| 15496 | 1438386_x_at | Mat2a         | NM_145569    | 0.0014337   | -1.29098 |
| 4859  | 1420657_at   | Ucp3          | NM_009464    | 0.0263882   | -1.29322 |
| 18156 | 1450086_at   | Gmeb1         | NM_00112299  | 0.00502313  | -1.29351 |
| 18040 | 1449970_at   | Capn12        | NM_00111080  | 0.0022094   | -1.29592 |
| 19130 | 1451060_at   | Gpr146        | NM_00103870  | 0.0424727   | -1.29623 |
| 10315 | 1426113_x_at | A130082M07Rik | ---          | 0.0336183   | -1.29647 |
| 10159 | 1425957_x_at | Tbata         | NM_00101740  | 0.0299785   | -1.29686 |
| 332   | 1415994_at   | Cyp2e1        | NM_021282    | 0.0226746   | -1.29721 |
| 20627 | 1452557_a_at | ---           | ---          | 0.00964298  | -1.29723 |
| 22136 | 1459701_x_at | ---           | ---          | 0.0165201   | -1.29895 |
| 4220  | 1419919_at   | ---           | ---          | 0.00812006  | -1.30089 |
| 3073  | 1418735_at   | Krt4          | NM_008475    | 0.048341    | -1.30137 |
| 21583 | 1455602_x_at | 1110028C15Rik | NM_00112273  | 0.0431284   | -1.30146 |
| 4472  | 1420240_at   | Smarcd1       | NM_031842    | 0.0397001   | -1.30285 |
| 4974  | 1420772_a_at | Tsc22d3       | NM_00107736  | 0.0213939   | -1.30456 |
| 16366 | 1448247_at   | Bcl7b         | NM_009745    | 0.0262202   | -1.30632 |
| 1059  | 1416721_s_at | Srsf6         | NM_026499    | 0.00218386  | -1.30763 |
| 574   | 1416236_a_at | Mpzl2         | NM_007962    | 0.042573    | -1.30849 |
| 18075 | 1450005_x_at | Dlk2          | NM_207666    | 0.000281102 | -1.30888 |
| 5332  | 1421130_at   | Zfp111        | NM_019940    | 0.0392125   | -1.30967 |
| 10167 | 1425965_at   | Ubc           | NM_019639    | 0.0337606   | -1.31115 |
| 13157 | 1431388_at   | Mphosph10     | NM_026483    | 0.0333511   | -1.31188 |
| 16573 | 1448454_at   | Srsf6         | NM_026499    | 0.0275624   | -1.31377 |
| 306   | 1415968_a_at | Kap           | NM_010594    | 0.000946919 | -1.3138  |
| 2588  | 1418250_at   | Arl4d         | NM_025404    | 0.031951    | -1.31584 |
| 17043 | 1448924_at   | Tmem186       | NM_025708    | 0.0489843   | -1.31713 |
| 7710  | 1423508_at   | Myst4         | NM_017479    | 0.017949    | -1.31846 |
| 14692 | 1436409_at   | Cox8a         | NM_007750    | 0.0155427   | -1.31929 |
| 4098  | 1419760_a_at | Rwdd2b        | NM_016924    | 0.000884486 | -1.32356 |
| 8802  | 1424600_at   | Abp1          | NM_00116162  | 0.0419602   | -1.32466 |
| 10089 | 1425887_at   | Tmem114       | NM_029070    | 0.0149261   | -1.32726 |
| 5766  | 1421564_at   | Serpina3c     | NM_008458    | 0.0266062   | -1.3285  |
| 2363  | 1418025_at   | Bhlhe40       | NM_011498    | 0.0126388   | -1.33028 |
| 17497 | 1449378_at   | Krt27         | NM_010666    | 0.0112896   | -1.33069 |
| 17581 | 1449462_at   | 3110049J23Rik | NM_026085    | 0.0335286   | -1.33084 |
| 15738 | 1438976_x_at | Mat2a         | NM_145569    | 0.0166398   | -1.33707 |
| 19274 | 1451204_at   | Scara5        | NM_00116831  | 0.0396884   | -1.33779 |
| 1058  | 1416720_at   | Srsf6         | NM_026499    | 0.00786099  | -1.33858 |
| 6447  | 1422245_a_at | Mrv1          | NM_010826 // | 0.0142958   | -1.34186 |
| 11583 | 1427381_at   | Irg1          | NM_008392    | 0.0112052   | -1.34218 |
| 7347  | 1423145_a_at | Tcap          | NM_011540    | 0.0228772   | -1.34428 |
| 14417 | 1435561_at   | Erf           | NM_010155    | 0.029545    | -1.34458 |
| 14757 | 1436669_at   | 1700019G17Rik | NM_00114589  | 0.0453465   | -1.34536 |
| 19397 | 1451327_a_at | Tmed1         | NM_010744    | 0.00373644  | -1.34632 |
| 17494 | 1449375_at   | Ces2a         | NM_00119033  | 0.0391801   | -1.35188 |

|       |              |                        |             |            |          |
|-------|--------------|------------------------|-------------|------------|----------|
| 22050 | 1456702_x_at | Mat2a                  | NM_145569   | 0.00318099 | -1.35469 |
| 728   | 1416390_at   | Rcbtb2                 | NM_00117069 | 0.0378798  | -1.35854 |
| 12225 | 1428023_at   | 3110009E18Rik          | NM_00117207 | 0.00403253 | -1.35856 |
| 6707  | 1422505_at   | Chrac1                 | NM_053068   | 0.0042741  | -1.36201 |
| 14758 | 1436670_x_at | 1700019G17Rik          | NM_00114589 | 0.0347971  | -1.37153 |
| 13028 | 1430891_at   | Dusp12                 | NM_023173   | 0.048818   | -1.37229 |
| 13319 | 1431921_a_at | Stag1                  | NM_009282   | 0.0477803  | -1.37308 |
| 18795 | 1450725_s_at | Car14                  | NM_011797   | 0.00135832 | -1.37501 |
| 9590  | 1425388_a_at | Tpk1                   | NM_013861   | 0.0303965  | -1.37927 |
| 4940  | 1420738_at   | Mzf1                   | NM_145819   | 0.0148419  | -1.37992 |
| 21913 | 1456370_s_at | 0610037L13Rik          | NM_028754   | 0.0387616  | -1.38158 |
| 10625 | 1426423_at   | Shmt2                  | NM_028230   | 0.0283213  | -1.38689 |
| 10328 | 1426126_a_at | Tmem149                | NM_145580   | 1.84E-05   | -1.39222 |
| 16178 | 1448042_s_at | Rnf2                   | NM_011277   | 0.0333823  | -1.39727 |
| 5374  | 1421172_at   | Adam12                 | NM_007400   | 0.0228304  | -1.39885 |
| 5855  | 1421653_a_at | Igh-2 /// Igh-VJ55 --- |             | 0.0447267  | -1.40366 |
| 11793 | 1427591_at   | Clcn1                  | NM_013491   | 0.026014   | -1.41317 |
| 2377  | 1418039_at   | Rabl3                  | NM_00104249 | 0.00973483 | -1.41424 |
| 2512  | 1418174_at   | Dbp                    | NM_016974   | 0.00755812 | -1.41429 |
| 17921 | 1449851_at   | Per1                   | NM_00115936 | 0.00302578 | -1.41483 |
| 4952  | 1420750_at   | 1110006O24Rik          | NR_027810   | 0.0133837  | -1.41533 |
| 18273 | 1450203_at   | Smyd1                  | NM_00116012 | 0.0143371  | -1.42832 |
| 5899  | 1421697_at   | Ush2a                  | NM_021408   | 0.0478428  | -1.4439  |
| 10902 | 1426700_a_at | Pan2                   | NM_133992   | 0.0131777  | -1.45715 |
| 7818  | 1423616_at   | Tarbp2                 | NM_009319   | 0.0218154  | -1.47398 |
| 6336  | 1422134_at   | Fosb                   | NM_008036   | 0.04363    | -1.48327 |
| 9441  | 1425239_at   | Setd4                  | NM_145482   | 0.0378394  | -1.54875 |
| 3322  | 1418984_at   | Inadl                  | NM_00100578 | 0.00135715 | -1.55588 |
